# Supplementary material for: Efficiency of mitigation measures targeting nutrient losses from agricultural drainage systems: A review
Source: PubMed Central journal article supplement (PMC7502647; doi:10.1007/s13280-020-01345-5), 2020-06-03
Supplement: 13280_2020_1345_MOESM1_ESM.pdf [file 13280_2020_1345_MOESM1_ESM.pdf]

**Ambio**

Electronic Supplementary Material

*This supplementary material has not been peer reviewed.*

**Title: Efficiency of mitigation measures targeting nutrient losses from agricultural drainage systems: a review**

Table S1. Search strings used for the search at Web Of Science 8 July 2019.

| Mitigation measures                                                                      | Search string                                                                                                                                                                                                                                                                                                                                                                                                                                              |
|------------------------------------------------------------------------------------------|------------------------------------------------------------------------------------------------------------------------------------------------------------------------------------------------------------------------------------------------------------------------------------------------------------------------------------------------------------------------------------------------------------------------------------------------------------|
| Free water surface constructed wetland and subsurface flow constructed wetland (FWS+SFF) | ((bed OR bio*reactor OR bio*filter OR layer OR wetland) AND (nitrogen OR phosph* OR TP OR TN OR nitrate OR NO3* OR PO4* OR TKN OR sediment*) AND (retention OR trap* OR reduc* OR denitrification OR uptake OR sedimentation OR remov* OR settling OR accretion OR precipitat* OR *sorption OR loss OR performance*) AND (agricultur* OR drain* ))                                                                                                         |
| Controlled drainage (CD)                                                                 | ("controlled drain*" OR "controlled tile drain*" OR "groundwater management" OR "drain* water management") AND (nitrogen OR phosph* OR TP OR TN OR nitrate OR NO3* OR PO4* OR TKN) AND (remov* OR retention OR loss OR reduc* OR denitrification OR performance*) AND (agricultur* OR drain*)                                                                                                                                                              |
| Saturated buffer zone (SBZ)                                                              | (saturat* OR redirect* OR reconnect* OR flooding OR inundation) AND ("buffer strip*" OR "buffer zone*" OR "riparian strip*" OR "riparian buffer" OR "riparian zone*") AND (nitrogen OR phosph* OR TP OR TN OR NO3* OR PO4* OR nitrate OR TKN OR sediment*) AND (retention OR trap* OR remov* OR reduc* OR loss OR denitrification OR uptake OR sedimentation OR settling OR accretion OR precipitat* OR *sorption* OR perfor*) AND (agricultur* OR drain*) |
| Integrated buffer zone (IBZ)                                                             | (integrat* OR ditch OR pond) AND ("buffer strip*" OR "buffer zone*" OR "riparian strip*" OR "riparian zone*") AND (nitrogen OR phosph* OR TP OR TN OR NO3* OR PO4* OR nitrate OR TKN OR sediment*) AND (retention OR trap* OR remov* OR reduc* OR loss OR denitrification OR uptake OR sedimentation OR settling OR accretion OR precipitat* OR *sorption* OR performance*) AND (agricultur* OR drain*)                                                    |

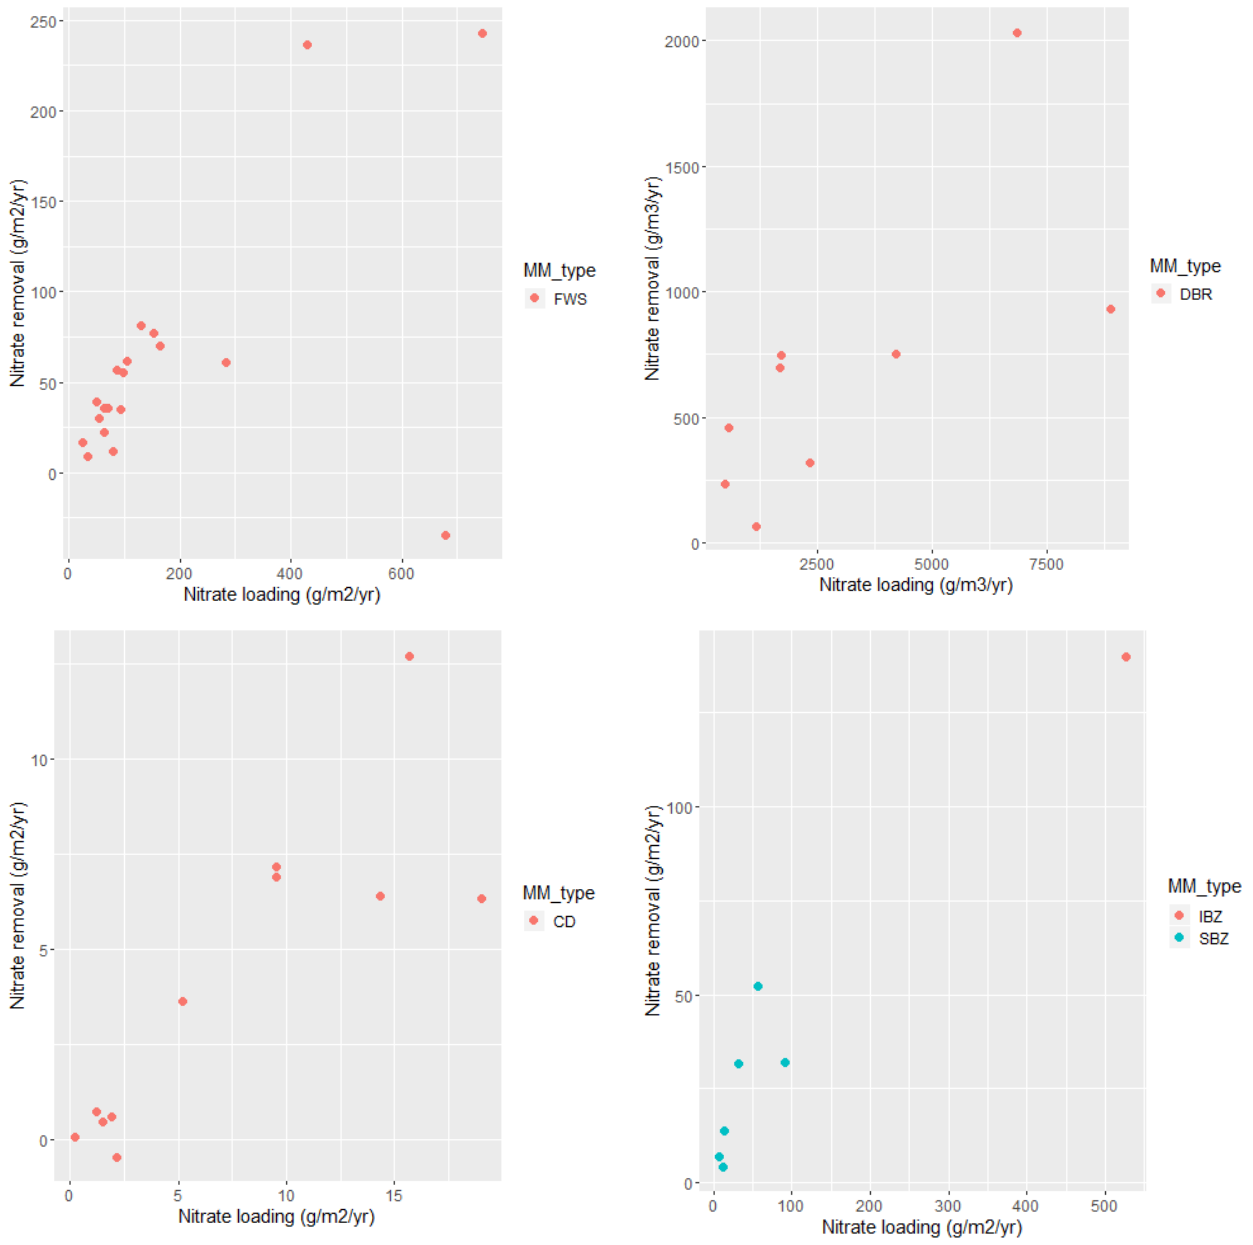

Figure S1. Nitrate removal rate ( $\text{g m}^{-2} \text{ yr}^{-1}$ ) vs. nitrate loading rate ( $\text{g m}^{-2} \text{ yr}^{-1}$ )

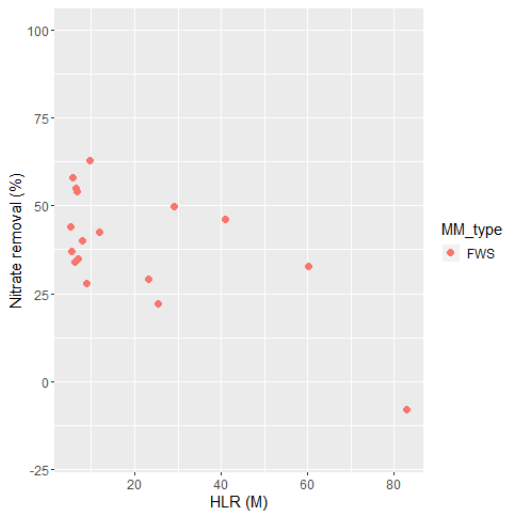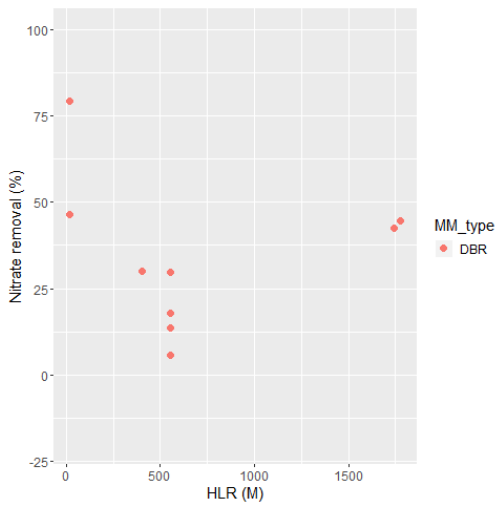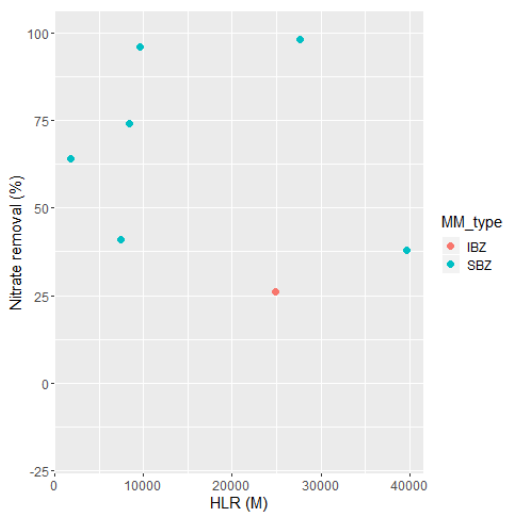

Figure S2 Nitrate removal efficiency (%) vs. hydraulic loading rate (HLR) (meter)

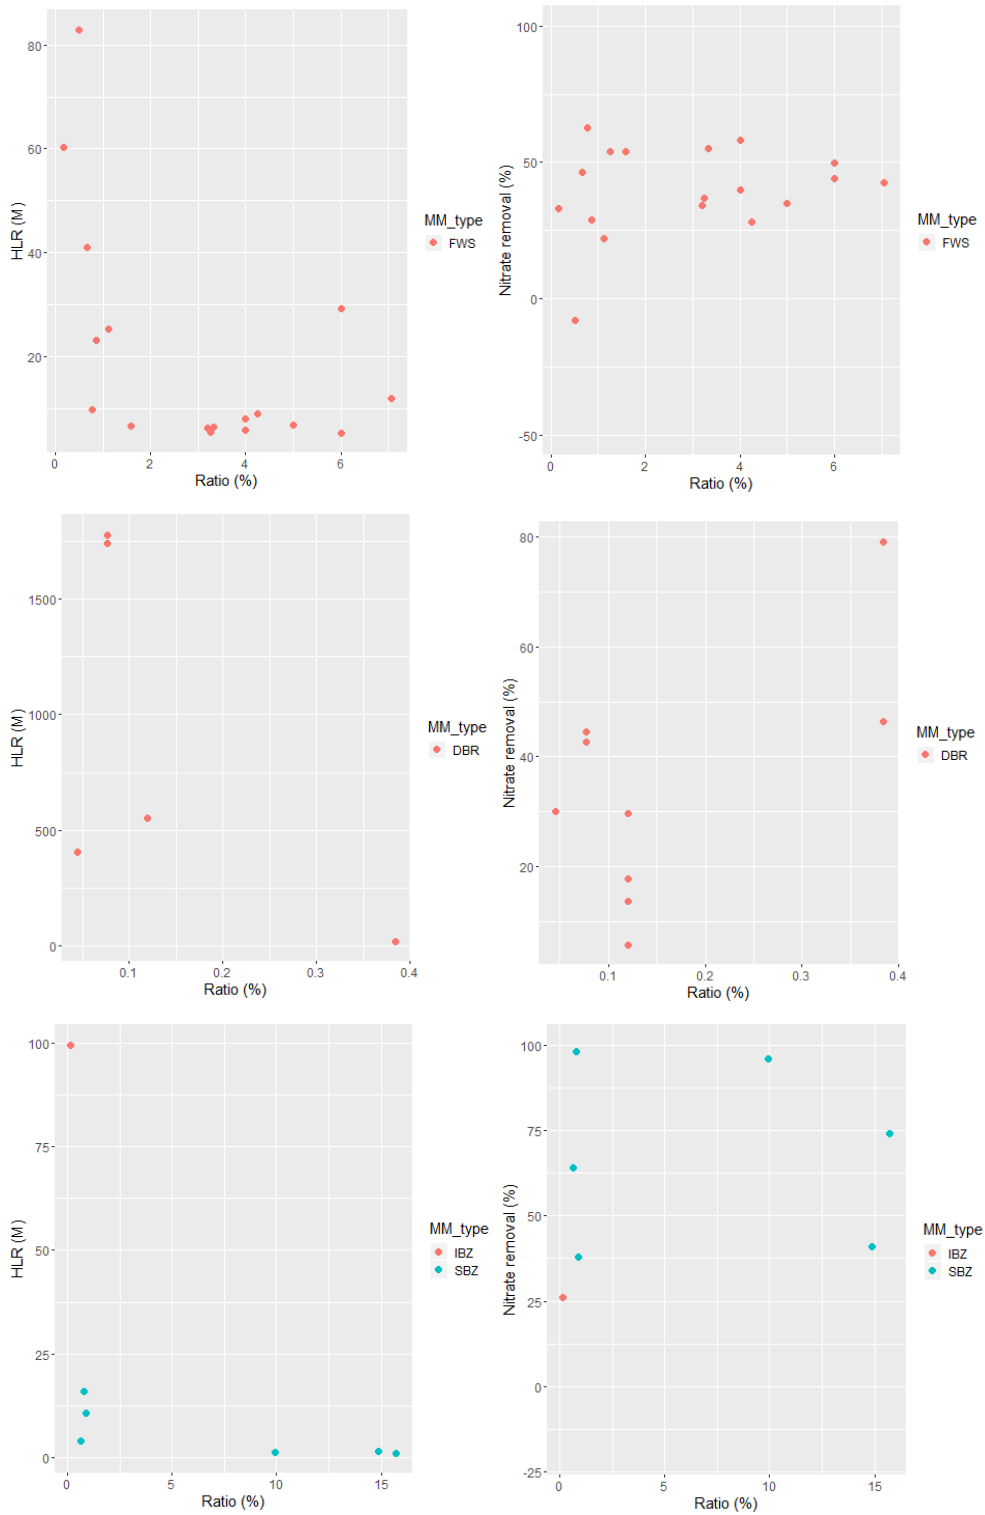

Figure S3. Nitrate removal efficiency (%) vs. facility to catchment ratio (Ratio) (%) and hydraulic loading rate (HLR) (M) vs. facility to catchment ratio (Ratio) (%).
